# Supplementary material for: Opening of glutamate receptor channel to subconductance levels
Source: PubMed Central journal article supplement (PMC9068512; doi:10.1038/s41586-022-04637-w), 2022-04-20
Supplement: 41586_2022_4637_MOESM1_ESM.pdf [file 41586_2022_4637_MOESM1_ESM.pdf]

## Supplementary information

---

# Opening of glutamate receptor channel to subconductance levels

---

In the format provided by the authors and unedited

# Supplementary Materials

## Supplementary Methods

### *Data Preparation for TSNE Clustering*

The first step in TSNE clustering is to compute the distance between all pairs of points. Traditionally, this is done by taking the Euclidean distance between all pairs of points. Because we include angles in our high-dimensional vectors, additional steps must be taken to ensure the validity of our pairwise distance matrix. In particular, we want to preserve the angular proximity of pairs of points which lie on either side of the periodic discontinuity (e.g., a pair of points with a particular angle that lies near  $-\pi$  and  $\pi$  radians). To do this, we split every angular component of every high-dimensional input vector into sine and cosine components. This way, the points  $-\pi$  and  $\pi$  radians with Euclidean distance  $2\pi$  become the points  $(-1,0)$ ,  $(-1,0)$  with Euclidean distance 0 which accounts for the fact that these are the same point. This means that in order to account for periodicity, our 4-dimensional vectors representing the four T617  $\chi_1$  dihedral angles are transformed to 8-dimensional vectors consisting of the sines and cosines of the original angles.

To mix the scalar data of the pairwise distances with the angular data of the T617  $\chi_1$  dihedral angles, we note that for any angle, the maximum possible Euclidean distance is 2. As such we scale and shift all pairwise distances such that the largest observed distance has a scaled value of 2 and the smallest observed value has a scaled value of 0.

### *Characterizing Clusters*

To characterize each identified TSNE cluster, the mean and standard deviation of relevant features were taken over all points in a particular cluster. For scalar values these were computed normally, but for angular points, the angular mean and standard deviation were taken. Table S1 shows the angular means and standard deviations of the four T617  $\chi_1$  dihedral angles for each cluster. Note that in addition to the aforementioned 2 radian and 4 radian states, we also observe a 0 radian state. This radian state was observed infrequently and for the purposes of analysis was counted as a “non-obstructing” state.

## Supplementary Tables

**Supplementary Table 1: Stability of the ion channel gate in equilibrium MD simulations.** The average values of the root-mean-square deviation (RMSD) from the initial structure calculated for the entire transmembrane domain (TMD) and the Gate region only (residues S615 to T625) for all simulated systems. The corresponding standard deviations are also listed. See Extended Data Table 2 for trajectory information.

| Systems | TMD RMSD |               | Gate RMSD |               |
|---------|----------|---------------|-----------|---------------|
|         | RMSD (Å) | Std. Dev. (Å) | RMSD (Å)  | Std. Dev. (Å) |
| NNNN    | 1.24     | 0.11          | 0.62      | 0.12          |
| GNNN    | 1.31     | 0.10          | 0.68      | 0.07          |
| GNGN1   | 1.74     | 0.17          | 2.20      | 0.93          |
| GNGN2   | 1.47     | 0.14          | 1.31      | 0.24          |
| NNGG    | 1.70     | 0.13          | 1.20      | 0.23          |
| GNGG    | 1.41     | 0.12          | 1.25      | 0.18          |
| GGGG    | 1.41     | 0.13          | 1.19      | 0.19          |
| 5WEO    | 1.78     | 0.16          | 1.84      | 0.28          |

**Supplementary Table 2.** 40 identified clusters from the TSNE analysis of the T617 sidechain  $\chi_1$  dihedral angles and pairwise distances. (See Extended Data Fig. 6)

| Cluster | T617 Chi1 Mean |       |       |       | T617 Chi1 Std |       |       |       |
|---------|----------------|-------|-------|-------|---------------|-------|-------|-------|
|         | A              | B     | C     | D     | A             | B     | C     | D     |
| a       | 4.074          | 4.125 | 4.102 | 2.147 | 0.146         | 0.149 | 0.143 | 0.160 |
| b       | 2.211          | 2.232 | 4.087 | 4.116 | 0.171         | 0.220 | 0.137 | 0.137 |
| c       | 4.092          | 4.048 | 2.218 | 2.251 | 0.139         | 0.162 | 0.169 | 0.156 |
| d       | 4.084          | 4.074 | 4.091 | 2.242 | 0.137         | 0.148 | 0.133 | 0.152 |
| e       | 4.094          | 2.243 | 4.084 | 4.106 | 0.128         | 0.156 | 0.139 | 0.147 |
| f       | 2.242          | 4.107 | 4.097 | 4.113 | 0.155         | 0.130 | 0.184 | 0.121 |
| g       | 2.220          | 4.086 | 4.089 | 2.224 | 0.308         | 0.138 | 0.133 | 0.175 |
| h       | 4.060          | 4.117 | 2.204 | 4.100 | 0.147         | 0.127 | 0.157 | 0.137 |
| i       | 4.052          | 2.236 | 2.251 | 2.244 | 0.152         | 0.295 | 0.236 | 0.150 |
| j       | 4.062          | 4.111 | 4.086 | 4.125 | 0.151         | 0.139 | 0.144 | 0.150 |
| k       | 2.243          | 2.261 | 4.044 | 2.252 | 0.157         | 0.146 | 0.137 | 0.141 |
| l       | 4.069          | 4.118 | 4.084 | 4.113 | 0.144         | 0.132 | 0.169 | 0.130 |
| m       | 2.272          | 4.056 | 2.234 | 2.222 | 0.164         | 0.151 | 0.166 | 0.260 |
| n       | 2.231          | 4.047 | 2.218 | 4.112 | 0.151         | 0.179 | 0.180 | 0.154 |
| o       | 2.247          | 4.084 | 4.082 | 4.124 | 0.149         | 0.157 | 0.132 | 0.143 |
| p       | 4.085          | 4.082 | 4.090 | 4.094 | 0.133         | 0.151 | 0.133 | 0.149 |
| q       | 2.241          | 2.241 | 2.240 | 2.224 | 0.151         | 0.151 | 0.154 | 0.157 |
| s       | 4.099          | 2.262 | 4.092 | 2.186 | 0.124         | 0.185 | 0.127 | 0.202 |
| t       | 2.294          | 4.055 | 4.049 | 2.199 | 0.161         | 0.145 | 0.126 | 0.153 |
| u       | 4.095          | 2.263 | 2.262 | 4.113 | 0.134         | 0.153 | 0.152 | 0.128 |
| v       | 4.041          | 4.107 | 4.040 | 0.213 | 0.149         | 0.130 | 0.546 | 0.161 |
| w       | 4.093          | 4.135 | 4.090 | 4.113 | 0.107         | 0.133 | 0.137 | 0.136 |
| x       | 2.234          | 2.186 | 2.264 | 2.237 | 0.151         | 0.139 | 0.157 | 0.144 |
| y       | 2.204          | 2.242 | 2.248 | 4.102 | 0.186         | 0.223 | 0.181 | 0.131 |
| z       | 4.060          | 4.047 | 4.049 | 4.066 | 0.135         | 0.142 | 0.138 | 0.140 |
| aa      | 4.131          | 2.298 | 0.377 | 4.066 | 0.127         | 0.110 | 0.280 | 0.122 |
| bb      | 2.231          | 4.071 | 2.173 | 2.240 | 0.176         | 0.144 | 0.174 | 0.145 |
| cc      | 2.087          | 2.238 | 4.019 | 2.229 | 0.561         | 0.152 | 0.420 | 0.169 |
| dd      | 4.085          | 4.064 | 2.233 | 4.105 | 0.131         | 0.179 | 0.161 | 0.145 |
| ee      | 4.069          | 4.101 | 2.181 | 2.229 | 0.157         | 0.129 | 0.149 | 0.149 |
| ff      | 4.029          | 0.401 | 2.300 | 4.080 | 0.135         | 0.187 | 0.132 | 0.171 |
| gg      | 2.278          | 4.070 | 4.149 | 0.276 | 0.145         | 0.139 | 0.143 | 0.190 |
| hh      | 2.243          | 4.112 | 2.225 | 4.100 | 0.159         | 0.124 | 0.153 | 0.131 |
| ii      | 2.317          | 2.243 | 4.101 | 0.463 | 0.128         | 0.135 | 0.130 | 0.154 |
| jj      | 4.065          | 0.345 | 4.127 | 4.071 | 0.127         | 0.154 | 0.145 | 0.263 |
| kk      | 4.070          | 4.103 | 0.316 | 4.100 | 0.143         | 0.142 | 0.199 | 0.136 |
| ll      | 2.240          | 4.090 | 4.106 | 4.108 | 0.151         | 0.134 | 0.146 | 0.128 |
| mm      | 0.117          | 4.102 | 4.075 | 4.043 | 0.205         | 0.148 | 0.148 | 0.145 |
| nn      | 2.158          | 4.134 | 4.108 | 4.129 | 0.182         | 0.146 | 0.126 | 0.160 |
| oo      | 4.065          | 4.107 | 4.066 | 2.055 | 0.146         | 0.129 | 0.157 | 0.166 |

**Supplementary Table 3.** Cluster average and standard deviation values of the distances measured between the C $\alpha$  atoms of T625 or T617 in diagonal subunits.

| Cluster | T625 Mean Dist |        | T617 Mean Dist |        | T625 Std Dist |       | T617 Std Dist |       |
|---------|----------------|--------|----------------|--------|---------------|-------|---------------|-------|
|         | AC             | BD     | AC             | BD     | AC            | BD    | AC            | BD    |
| a       | 28.509         | 24.920 | 13.234         | 12.560 | 0.874         | 0.897 | 0.444         | 0.459 |
| b       | 14.849         | 26.345 | 12.141         | 13.196 | 2.330         | 2.396 | 0.674         | 0.722 |
| c       | 12.077         | 22.203 | 11.868         | 12.131 | 1.735         | 8.344 | 0.575         | 0.548 |
| d       | 14.712         | 26.529 | 12.184         | 13.304 | 2.583         | 4.285 | 0.990         | 0.821 |
| e       | 14.315         | 26.690 | 12.479         | 13.398 | 2.540         | 2.126 | 0.809         | 0.644 |
| f       | 22.885         | 29.101 | 11.479         | 13.577 | 1.169         | 0.853 | 0.480         | 0.722 |
| g       | 18.123         | 27.546 | 11.670         | 13.164 | 2.618         | 1.431 | 1.002         | 0.800 |
| h       | 20.103         | 29.045 | 11.908         | 14.105 | 2.525         | 1.256 | 0.600         | 0.919 |
| i       | 10.486         | 12.598 | 11.233         | 11.717 | 1.259         | 5.906 | 0.501         | 0.474 |
| j       | 29.077         | 26.400 | 13.672         | 13.573 | 1.202         | 2.548 | 0.605         | 0.844 |
| k       | 10.596         | 11.240 | 11.026         | 11.619 | 1.155         | 4.149 | 0.479         | 0.441 |
| l       | 22.807         | 29.675 | 11.590         | 13.987 | 1.454         | 1.225 | 0.498         | 0.757 |
| m       | 10.741         | 13.135 | 11.575         | 11.594 | 1.216         | 6.814 | 0.470         | 0.536 |
| n       | 12.311         | 27.173 | 12.000         | 12.754 | 1.798         | 5.996 | 0.474         | 0.808 |
| o       | 15.271         | 26.757 | 12.683         | 13.274 | 2.340         | 3.023 | 0.565         | 0.853 |
| p       | 15.173         | 27.908 | 12.803         | 13.579 | 2.651         | 1.577 | 0.835         | 0.913 |
| q       | 10.275         | 10.298 | 11.098         | 11.382 | 0.651         | 1.042 | 0.462         | 0.450 |
| s       | 13.089         | 25.760 | 12.040         | 12.903 | 1.802         | 3.222 | 0.716         | 0.544 |
| t       | 10.713         | 15.067 | 11.498         | 11.898 | 0.744         | 8.883 | 0.435         | 0.509 |
| u       | 10.605         | 25.069 | 11.606         | 13.065 | 1.216         | 3.140 | 0.518         | 0.599 |
| v       | 21.706         | 28.461 | 11.367         | 13.122 | 2.438         | 1.033 | 0.514         | 0.596 |
| w       | 24.658         | 30.995 | 13.965         | 14.756 | 1.129         | 1.167 | 0.606         | 0.668 |
| x       | 15.741         | 27.595 | 10.365         | 11.029 | 0.652         | 0.583 | 0.389         | 0.593 |
| y       | 10.262         | 22.863 | 11.493         | 12.564 | 1.174         | 6.785 | 0.440         | 0.747 |
| z       | 10.415         | 16.052 | 11.881         | 11.950 | 1.103         | 8.136 | 0.331         | 0.343 |
| aa      | 10.511         | 24.494 | 11.719         | 13.318 | 1.330         | 1.640 | 0.620         | 0.377 |
| bb      | 17.105         | 28.040 | 10.978         | 13.388 | 1.518         | 0.887 | 0.603         | 0.643 |
| cc      | 14.910         | 25.619 | 12.118         | 12.655 | 2.004         | 4.444 | 0.768         | 0.679 |
| dd      | 12.669         | 26.779 | 12.149         | 12.904 | 1.626         | 5.082 | 0.610         | 0.845 |
| ee      | 16.832         | 28.182 | 11.171         | 14.096 | 1.717         | 1.005 | 0.757         | 0.626 |
| ff      | 11.362         | 27.381 | 11.750         | 13.053 | 1.630         | 1.957 | 0.523         | 0.683 |
| gg      | 20.573         | 27.993 | 11.920         | 13.070 | 2.846         | 1.403 | 0.827         | 0.694 |
| hh      | 18.739         | 28.349 | 11.433         | 14.335 | 1.598         | 1.021 | 0.614         | 0.767 |
| ii      | 16.253         | 25.919 | 12.905         | 12.379 | 0.574         | 1.133 | 0.794         | 0.466 |
| jj      | 15.525         | 26.831 | 12.784         | 13.427 | 1.638         | 0.857 | 0.673         | 0.697 |
| kk      | 18.788         | 28.602 | 12.247         | 13.304 | 4.783         | 1.020 | 0.791         | 0.593 |
| ll      | 18.386         | 28.432 | 11.505         | 14.124 | 1.680         | 1.424 | 0.481         | 0.937 |
| mm      | 19.937         | 28.834 | 12.667         | 14.704 | 2.589         | 1.054 | 0.789         | 0.632 |
| nn      | 28.039         | 27.124 | 13.301         | 13.886 | 1.287         | 0.953 | 0.589         | 0.703 |
| oo      | 22.105         | 28.910 | 11.331         | 12.849 | 0.902         | 0.667 | 0.418         | 0.488 |

**Supplementary Table 4.** 40 identified clusters from the TSNE analysis of the T617 sidechain  $\chi_1$  dihedral angles and pairwise distances alongside the average number of water molecules that permeate the gate region immediately following the frame in the given cluster. Table is ordered according to the number of non-obstructing sidechains followed by the average permeation observed for the corresponding cluster. The last column shows the number of T617 sidechains in the non-obstructing configuration when counting the 0 radian state as a non-obstructing state.

| Cluster | T617 Chi1 Mean |       |       |       | T625 Mean Dist |        | T617 Mean Dist |        | Avg Permittivity<br>(water/ns) | No. "Obstructing"<br>Sidechains |
|---------|----------------|-------|-------|-------|----------------|--------|----------------|--------|--------------------------------|---------------------------------|
|         | A              | B     | C     | D     | AC             | BD     | AC             | BD     |                                |                                 |
| q       | 2.241          | 2.241 | 2.240 | 2.224 | 10.275         | 10.298 | 11.098         | 11.382 | 0.056                          | 4                               |
| x       | 2.234          | 2.186 | 2.264 | 2.237 | 15.741         | 27.595 | 10.365         | 11.029 | 0.220                          | 4                               |
| k       | 2.243          | 2.261 | 4.044 | 2.252 | 10.596         | 11.240 | 11.026         | 11.619 | 0.441                          | 3                               |
| i       | 4.052          | 2.236 | 2.251 | 2.244 | 10.486         | 12.598 | 11.233         | 11.717 | 1.137                          | 3                               |
| m       | 2.272          | 4.056 | 2.234 | 2.222 | 10.741         | 13.135 | 11.575         | 11.594 | 1.207                          | 3                               |
| y       | 2.204          | 2.242 | 2.248 | 4.102 | 10.262         | 22.863 | 11.493         | 12.564 | 2.761                          | 3                               |
| bb      | 2.231          | 4.071 | 2.173 | 2.240 | 17.105         | 28.040 | 10.978         | 13.388 | 7.312                          | 3                               |
| cc      | 2.087          | 2.238 | 4.019 | 2.229 | 14.910         | 25.619 | 12.118         | 12.655 | 8.485                          | 3                               |
| t       | 2.294          | 4.055 | 4.049 | 2.199 | 10.713         | 15.067 | 11.498         | 11.898 | 1.287                          | 2                               |
| u       | 4.095          | 2.263 | 2.262 | 4.113 | 10.605         | 25.069 | 11.606         | 13.065 | 4.240                          | 2                               |
| c       | 4.092          | 4.048 | 2.218 | 2.251 | 12.077         | 22.203 | 11.868         | 12.131 | 5.553                          | 2                               |
| n       | 2.231          | 4.047 | 2.218 | 4.112 | 12.311         | 27.173 | 12.000         | 12.754 | 7.184                          | 2                               |
| b       | 2.211          | 2.232 | 4.087 | 4.116 | 14.849         | 26.345 | 12.141         | 13.196 | 8.352                          | 2                               |
| ee      | 4.069          | 4.101 | 2.181 | 2.229 | 16.832         | 28.182 | 11.171         | 14.096 | 9.279                          | 2                               |
| s       | 4.099          | 2.262 | 4.092 | 2.186 | 13.089         | 25.760 | 12.040         | 12.903 | 9.550                          | 2                               |
| g       | 2.220          | 4.086 | 4.089 | 2.224 | 18.123         | 27.546 | 11.670         | 13.164 | 11.515                         | 2                               |
| ii      | 2.317          | 2.243 | 4.101 | 0.463 | 16.253         | 25.919 | 12.905         | 12.379 | 12.156                         | 2                               |
| hh      | 2.243          | 4.112 | 2.225 | 4.100 | 18.739         | 28.349 | 11.433         | 14.335 | 12.718                         | 2                               |
| aa      | 4.131          | 2.298 | 0.377 | 4.066 | 10.511         | 24.494 | 11.719         | 13.318 | 3.729                          | 1                               |
| a       | 4.074          | 4.125 | 4.102 | 2.147 | 28.509         | 24.920 | 13.234         | 12.560 | 6.878                          | 1                               |
| dd      | 4.085          | 4.064 | 2.233 | 4.105 | 12.669         | 26.779 | 12.149         | 12.904 | 9.033                          | 1                               |
| oo      | 4.065          | 4.107 | 4.066 | 2.055 | 22.105         | 28.910 | 11.331         | 12.849 | 9.712                          | 1                               |
| gg      | 2.278          | 4.070 | 4.149 | 0.276 | 20.573         | 27.993 | 11.920         | 13.070 | 10.342                         | 1                               |
| ff      | 4.029          | 0.401 | 2.300 | 4.080 | 11.362         | 27.381 | 11.750         | 13.053 | 10.424                         | 1                               |
| e       | 4.094          | 2.243 | 4.084 | 4.106 | 14.315         | 26.690 | 12.479         | 13.398 | 11.103                         | 1                               |
| d       | 4.084          | 4.074 | 4.091 | 2.242 | 14.712         | 26.529 | 12.184         | 13.304 | 11.149                         | 1                               |
| o       | 2.247          | 4.084 | 4.082 | 4.124 | 15.271         | 26.757 | 12.683         | 13.274 | 11.742                         | 1                               |
| f       | 2.242          | 4.107 | 4.097 | 4.113 | 22.885         | 29.101 | 11.479         | 13.577 | 12.395                         | 1                               |
| ll      | 2.240          | 4.090 | 4.106 | 4.108 | 18.386         | 28.432 | 11.505         | 14.124 | 14.691                         | 1                               |
| h       | 4.060          | 4.117 | 2.204 | 4.100 | 20.103         | 29.045 | 11.908         | 14.105 | 15.448                         | 1                               |
| nn      | 2.158          | 4.134 | 4.108 | 4.129 | 28.039         | 27.124 | 13.301         | 13.886 | 19.227                         | 1                               |
| z       | 4.060          | 4.047 | 4.049 | 4.066 | 10.415         | 16.052 | 11.881         | 11.950 | 3.096                          | 0                               |
| v       | 4.041          | 4.107 | 4.040 | 0.213 | 21.706         | 28.461 | 11.367         | 13.122 | 11.219                         | 0                               |
| j       | 4.062          | 4.111 | 4.086 | 4.125 | 29.077         | 26.400 | 13.672         | 13.573 | 13.477                         | 0                               |
| jj      | 4.065          | 0.345 | 4.127 | 4.071 | 15.525         | 26.831 | 12.784         | 13.427 | 13.840                         | 0                               |
| l       | 4.069          | 4.118 | 4.084 | 4.113 | 22.807         | 29.675 | 11.590         | 13.987 | 14.099                         | 0                               |
| kk      | 4.070          | 4.103 | 0.316 | 4.100 | 18.788         | 28.602 | 12.247         | 13.304 | 14.428                         | 0                               |
| mm      | 0.117          | 4.102 | 4.075 | 4.043 | 19.937         | 28.834 | 12.667         | 14.704 | 14.918                         | 0                               |
| p       | 4.085          | 4.082 | 4.090 | 4.094 | 15.173         | 27.908 | 12.803         | 13.579 | 15.249                         | 0                               |
| w       | 4.093          | 4.135 | 4.090 | 4.113 | 24.658         | 30.995 | 13.965         | 14.756 | 27.742                         | 0                               |



**Supplementary Table 6:** Correlation of water permeation throughout MD simulations. Shown is correlation of permeation values from the trajectory snapshots saved at 10 ps (Y) and 250 ps (X). Polynomial regression analysis shows correlation with  $R^2 = 0.985$ . See Methods section for calculation details.

|            | From 250ps data   | From 10ps data    | For 10ps                 |            |
|------------|-------------------|-------------------|--------------------------|------------|
|            | X                 | Y                 | $y = 0.0757x^2 + 1.218x$ |            |
| Systems    | Permeation per ns | Permeation per ns | Projected Values         | Difference |
| 5WEO-Rep1  | 7.176             | 16.300            | 12.639                   | -3.661     |
| 5WEO-Rep1  | 5.752             | 8.900             | 9.511                    | 0.611      |
| 5WEO-Rep1  | 6.248             | 10.325            | 10.565                   | 0.240      |
| 5WEO-Rep1  | 6.952             | 12.225            | 12.126                   | -0.099     |
| 5WEO-Rep1  | 11.900            | 25.650            | 25.214                   | -0.436     |
| 5WEO-Rep1  | 11.324            | 25.675            | 23.500                   | -2.175     |
| 5WEO-Rep1  | 6.824             | 11.625            | 11.837                   | 0.212      |
| 5WEO-Rep1  | 3.924             | 6.200             | 5.945                    | -0.255     |
| 5WEO-Rep1  | 5.652             | 9.300             | 9.302                    | 0.002      |
| 5WEO-Rep1  | 7.300             | 13.150            | 12.925                   | -0.225     |
| 5WEO-Rep1  | 4.620             | 6.925             | 7.243                    | 0.318      |
| 5WEO-Rep2  | 7.600             | 14.850            | 13.629                   | -1.221     |
| 5WEO-Rep2  | 7.124             | 10.275            | 12.519                   | 2.244      |
| 5WEO-Rep2  | 6.400             | 12.150            | 10.896                   | -1.254     |
| 5WEO-Rep2  | 6.276             | 10.075            | 10.626                   | 0.551      |
| 5WEO-Rep2  | 7.224             | 12.650            | 12.749                   | 0.099      |
| 5WEO-Rep2  | 5.048             | 7.700             | 8.077                    | 0.377      |
| 5WEO-Rep2  | 6.024             | 9.775             | 10.084                   | 0.309      |
| 5WEO-Rep2  | 5.324             | 8.850             | 8.630                    | -0.220     |
| 5WEO-Rep2  | 10.224            | 20.800            | 20.366                   | -0.434     |
| 5WEO-Rep2  | 5.752             | 9.200             | 9.511                    | 0.311      |
| 5WEO-Rep2  | 10.052            | 19.975            | 19.892                   | -0.083     |
| GNGN1-Rep1 | 4.600             | 7.225             | 7.205                    | -0.020     |
| GNGN1-Rep1 | 6.200             | 9.650             | 10.462                   | 0.812      |
| GNGN1-Rep1 | 6.876             | 12.900            | 11.954                   | -0.946     |
| GNGN1-Rep2 | 4.576             | 7.050             | 7.159                    | 0.109      |
| GNGN1-Rep2 | 10.524            | 19.925            | 21.202                   | 1.277      |
| GNGN1-Rep2 | 5.924             | 9.725             | 9.872                    | 0.147      |
| GNGN2-Rep1 | 4.752             | 8.125             | 7.497                    | -0.628     |
| GNGN2-Rep1 | 9.976             | 19.375            | 19.684                   | 0.309      |
| GNGN2-Rep1 | 11.848            | 24.500            | 25.057                   | 0.557      |
| NNGG-Rep1  | 6.800             | 11.675            | 11.783                   | 0.108      |
| NNGG-Rep1  | 6.276             | 10.275            | 10.626                   | 0.351      |
| NNGG-Rep1  | 5.876             | 9.725             | 9.771                    | 0.046      |
| NNGG-Rep1  | 8.024             | 13.625            | 14.647                   | 1.022      |
| NNGG-Rep1  | 2.648             | 3.500             | 3.756                    | 0.256      |
| NNGG-Rep1  | 7.524             | 12.225            | 13.450                   | 1.225      |
| GNGG-Rep1  | 5.224             | 8.725             | 8.429                    | -0.296     |
| GNGG-Rep1  | 6.700             | 11.525            | 11.559                   | 0.034      |
| GNGG-Rep1  | 6.724             | 11.100            | 11.612                   | 0.512      |



|           |        |        |        |        |
|-----------|--------|--------|--------|--------|
| GGGG-Rep1 | 8.552  | 16.975 | 15.953 | -1.022 |
| GGGG-Rep1 | 3.700  | 5.875  | 5.543  | -0.332 |
| GGGG-Rep1 | 5.048  | 7.975  | 8.077  | 0.102  |
| GGGG-Rep1 | 6.324  | 9.800  | 10.730 | 0.930  |
| GGGG-Rep1 | 6.424  | 10.725 | 10.948 | 0.223  |
| GGGG-Rep1 | 4.000  | 6.625  | 6.083  | -0.542 |
| GGGG-Rep2 | 6.276  | 9.925  | 10.626 | 0.701  |
| GGGG-Rep2 | 8.552  | 16.050 | 15.953 | -0.097 |
| GGGG-Rep2 | 11.376 | 21.800 | 23.653 | 1.853  |
| GGGG-Rep2 | 7.776  | 15.925 | 14.048 | -1.877 |
| GGGG-Rep2 | 5.024  | 8.000  | 8.030  | 0.030  |
| GGGG-Rep2 | 5.076  | 8.075  | 8.133  | 0.058  |
| GNNN      | 0.124  | 0.200  | 0.152  | -0.048 |
| GNNN      | 0.024  | 0.025  | 0.029  | 0.004  |
| GNNN      | 0.000  | 0.050  | 0.000  | -0.050 |
| NNNN-Rep1 | 0.024  | 0.125  | 0.029  | -0.096 |
| NNNN-Rep1 | 0.052  | 0.075  | 0.064  | -0.011 |
| NNNN-Rep1 | 0.100  | 0.150  | 0.123  | -0.027 |
| NNNN-Rep1 | 0.100  | 0.100  | 0.123  | 0.023  |
| NNNN-Rep1 | 0.176  | 0.300  | 0.217  | -0.083 |
| NNNN-Rep2 | 0.000  | 0.050  | 0.000  | -0.050 |
| NNNN-Rep2 | 0.100  | 0.100  | 0.123  | 0.023  |
| NNNN-Rep2 | 0.024  | 0.025  | 0.029  | 0.004  |
| NNNN-Rep2 | 0.024  | 0.075  | 0.029  | -0.046 |
| NNNN-Rep2 | 0.052  | 0.075  | 0.064  | -0.011 |
| NNNN-Rep2 | 0.000  | 0.000  | 0.000  | 0.000  |

---

**R<sup>2</sup> = 0.985**

---

**Supplementary Table 7.** Uncertainty Analysis of Ion permeation in non-equilibrium MD simulations with applied voltage (Extended Data Table 3). Each trajectory was divided into 40 ns non-overlapping blocks and conductance computed as described in Methods.

| 40 ns trajectory blocks |                       |       |       |       |      |      |      |       |       |       |                                 |                       |
|-------------------------|-----------------------|-------|-------|-------|------|------|------|-------|-------|-------|---------------------------------|-----------------------|
| Simulation              | Cluster/<br>Structure | 1     | 2     | 3     | 4    | 5    | 6    | 7     | 8     | 9     | Avg.<br>Conduc<br>tance<br>(pS) | Std.<br>Error<br>(pS) |
| <b>O3</b>               |                       |       |       |       |      |      |      |       |       |       |                                 |                       |
| <b>Sys1</b>             | w(GNGN-2)             | 107.0 | 93.5  | 66.8  | 6.7  | 13.4 | 33.4 | 40.1  | 66.8  | 100.0 | 58.6                            | 37.3                  |
| <b>Sys2</b>             | w(GNGN-2)             | 160.0 | 107.0 | 140.0 | 60.1 | 0.0  | 60.1 | 100.0 | 120.0 | 113.0 | 95.6                            | 48.5                  |
| <b>Sys3</b>             | w(5WEO)               | 0.0   | 107.0 | 93.5  | 86.8 | 66.8 | 40.1 | 13.4  | 20.0  | 6.7   | 48.3                            | 41.0                  |
| <b>O2</b>               |                       |       |       |       |      |      |      |       |       |       |                                 |                       |
| <b>Sys1</b>             | p(5WEO)               | 33.4  | 53.4  | 13.4  | 20.0 | 6.7  | 13.4 | 40.0  | 26.7  | 6.7   | 23.7                            | 16.0                  |
| <b>Sys2</b>             | p(5WEO)               | 0.0   | 26.7  | 107.0 | 93.5 | 33.4 | 6.7  | 6.7   | 6.7   | 26.7  | 34.2                            | 39.3                  |
| <b>Sys3</b>             | e(GGGG-Rep2)          | 40.1  | 80.1  | 40.1  | 60.1 | 20.1 | 33.4 | 73.4  | 66.8  | 60.1  | 52.7                            | 20.1                  |
| <b>O1</b>               |                       |       |       |       |      |      |      |       |       |       |                                 |                       |
| <b>Sys1</b>             | b(GGGG-Rep2)          | 0.0   | 0.0   | 26.7  | 13.4 | 6.7  | 20.0 | 13.4  | 13.4  | 13.4  | 11.9                            | 8.7                   |
| <b>Sys2</b>             | b(GGGG-Rep2)          | 0.0   | 0.0   | 26.7  | 13.4 | 6.7  | 6.7  | 0.0   | 6.7   | 46.7  | 11.9                            | 15.6                  |
| <b>Sys3</b>             | b(GGGG-Rep2)          | 0.0   | 13.4  | 0.0   | 0.0  | 6.7  | 0.0  | 6.7   | 6.7   | 6.7   | 4.5                             | 4.7                   |
